# Supplementary material for: Educational Intervention of Healthy Life Promotion for Children with a Migrant Background or at Socioeconomic Disadvantage in the North of Italy: Efficacy of Telematic Tools in Improving Nutritional and Physical Activity Knowledge
Source: MDPI journal article supplement (doi:10.3390/nu13103634), 2021-10-17
Supplement: s1 [file s1]

# PIRAMIDE ALIMENTARE TRANSCULTURALE

Uno strumento di educazione alimentare per tutti i bambini sin dall'età prescolare.

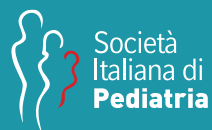

## Come orientarsi nella scelta degli alimenti

**LATTE:** parzialmente scremato. **YOGURT:** parzialmente scremato bianco o alla frutta. **CEREALI:** preferire cereali integrali e riso parboiled (quest'ultimo massimo 2 volte alla settimana). Si raccomanda la cottura al dente. **PANE:** 1 panino al giorno, preferire quello preparato con farine integrali o con farina tipo 1. **CARNE:** pollo, coniglio, tacchino, vitello, manzo magro, maiale magro. **PESCE:** fresco o surgelato, preferire il pesce azzurro (sarde, alici). Merluzzo, nasello, sgombrò, spigola o pesce persico meglio non più di 1 volta a settimana. Crostacei e molluschi bivalvi saltuariamente. Da evitare pesce di grossa taglia (pesce spada e tonno). **LEGUMI:** freschi, secchi o surgelati vanno sempre associati nello stesso pasto ai cereali (pasta, riso, orzo). Non sono verdure, ma una alternativa a carne, pesce, uova e formaggi. **FRUTTA:** 2 - 3 volte al giorno. Da preferire quella di stagione. Non frullata o passata. Da assumere non più di 2 o 3 volte alla settimana: kiwi o uva o banana o ananas o papaya o jackfruit. Da limitare (<1 volta alla settimana): plantano o datteri o avocado o tamarindo. **VERDURA:** fresca o surgelata, non frullata o passata, 2 volte al giorno. Da preferire verdura di stagione. **CONDIMENTI:** olio extra vergine di oliva. **SALE:** da limitare. **COTTURA:** in umido, al vapore, al forno, al cartoccio.

### DOLCI-SNACK (consumo al minimo)

patatine fritte, platano fritto, cioccolato nachos, patate dolci stufate, frittelle di mele, dulce de leche, budino di riso, banane verdi stufate

### CONDIMENTI (consumo al minimo)

utilizzo giornaliero dell'olio di oliva

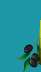

### UOVA, TUBERI E RADICI

1 - 2 porzioni settimanali

### FORMAGGI

2 porzioni settimanali

### CARNE

Max 3 porzioni settimanali. Pollo, tacchino, vitello, manzo magro, maiale magro, agnello, coniglio, anatra

### PESCE

3 - 4 porzioni settimanali. Alici, sarde, calamari, merluzzo, gamberi

### LEGUMI

4 - 5 porzioni settimanali. Fagioli, lenticchie, piselli, ceci, soia, fave

### NOCI-SEMI

1 porzione al giorno

### LATTE-YOGURT

1 - 2 porzioni al giorno

### CEREALI

3 - 5 porzioni al giorno. Grano, mais, farro, orzo, sorgo, miglio, grano saraceno, quinoa, (preferire cereali integrali), riso parboiled

### FRUTTA-ORTAGGI

3 - 5 porzioni al giorno (varietà di colori e di consistenza). Pomodori, melanzane, okra, carote, germogli di bamboo, squash, mele, arance, albicocche, guava, ciliegie, litchis, frutto della passione, mango, papaya

### ACQUA

Assunzione giornaliera adeguata

### ATTIVITA' FISICA-ADEGUATO RIPOSO

Convivialità, biodiversità e stagionalità, prodotti locali ed ecologici

### TIPICITÀ

#### REGIONI AFRICANE

CEREALI: teff, sorgo

VERDURA E FRUTTA: okra, foglie di cassava, foglie del baobab, frutto della passione, frutto del baobab, guava, mango

#### REGIONI ASIATICHE

CEREALI: miglio, grano saraceno

VERDURA E FRUTTA: okra, germogli di bamboo, alghe marine, frutto del drago, litchis

#### REGIONI SUD AMERICA

CEREALI: quinoa, amaranto

VERDURA E FRUTTA: squash, okra, mango, fichi d'india, guava, melagrana

#### REGIONI MEDITERRANEE

CEREALI: grano duro (pasta, burghul, cous cous), grano tenero, farro

VERDURA E FRUTTA: pomodori, insalata, zucchine, mele, arance, albicocche

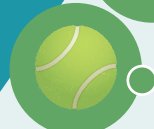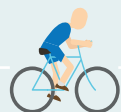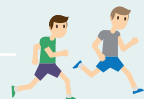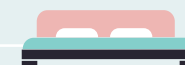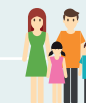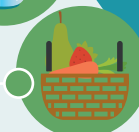

## PER MANTENERSI IN FORMA SI CONSIGLIA DI:

Svolgere attività fisica quotidiana per almeno 1 ora. Alimentarsi in modo variato ed equilibrato. Mantenere l'abitudine di una prima colazione adeguata: è il carburante per la mattinata, l'attività scolastica e per il gioco. Evitare periodi di digiuno prolungati e distribuire ogni giorno gli alimenti in 4-5 pasti:

### COLAZIONE: 15% delle calorie giornaliere.

La prima colazione può essere molto semplice ma deve essere completa:

- Latte o yogurt parzialmente scremato.
- Fette biscottate o pane integrale con marmellata o muesli o biscotti secchi o cereali per la prima colazione integrali.
- Frutta fresca o eventualmente spremuta di arancia.

### SPUNTINO AL MATTINO: 5% delle calorie.

### MERENDA A METÀ POMERIGGIO: 10% delle calorie.

La merenda di metà mattina e quella del pomeriggio sono momenti importanti della giornata perché servono a non lasciare un lungo intervallo tra i pasti, evitando di arrivare a pranzo o a cena affamati, con il rischio di mangiare troppo.

### PRANZO: 40% delle calorie - CENA: 30% delle calorie.

Per assicurare un corretto apporto di tutti i nutrienti devono essere presenti carboidrati, proteine, lipidi e fibre. Due possono essere gli schemi da seguire:

- Piatto unico: primo piatto condito con carne o pesce o legumi o formaggio o uova + verdura + frutta.
- Primo piatto condito con verdura + secondo piatto (carne o pesce o legumi o formaggio o uova) + verdura + frutta.

Importante poi un'assunzione giornaliera adeguata di acqua!

## LA DIETA MEDITERRANEA: VERSO UNA STRATEGIA NUTRIZIONALE E TRANSCULTURALE

La Dieta Mediterranea è caratterizzata da un modello nutrizionale costituito principalmente da assunzione appropriata di alimenti e nutrienti e stili di vita corretti:

- 5 pasti quotidiani (ad ogni pasto quantità moderate di cibi, possibilmente freschi e stagionali, dando importanza alla convivialità).
- Elevata assunzione di verdura, legumi, frutta, noci e cereali integrali.
- Consumo di pesce medio-alto.
- Elevata assunzione di acidi grassi insaturi (in particolar modo provenienti dall'olio di oliva).
- Basso intake di acidi grassi saturi.
- Medio-basso intake di prodotti caseari.
- Ridotta assunzione di carne, soprattutto rossa.
- Apporto moderato di sale.
- Stili di vita corretti fra i quali irrinunciabili l'esercizio fisico quotidiano.

Nella società multi-etnica presente in Italia l'aderenza alla dieta mediterranea è un importante strumento di prevenzione delle malattie croniche nell'adulto promuovendo l'integrazione di tradizioni alimentari diverse.

### I 14 PASTI SETTIMANALI POSSONO ESSERE COSÌ SUDDIVISI:

|                                                                                                                 |                                                                                                                                                                                 |
|-----------------------------------------------------------------------------------------------------------------|---------------------------------------------------------------------------------------------------------------------------------------------------------------------------------|
|  FRUTTA E VERDURA             | 3-5 porzioni al giorno                                                                                                                                                          |
|  PASTA, RISO O ALTRI CEREALI | 3-5 porzioni al giorno                                                                                                                                                          |
|  TUBERI                      | 1-2 volte la settimana<br>(in sostituzione al primo piatto)                                                                                                                     |
|  LATTE E YOGURT              | 1-2 porzioni al giorno                                                                                                                                                          |
|  NOCI E SEMI                 | 1 porzione al giorno (es 3-4 noci)                                                                                                                                              |
|  CARNE                       | Max 3 volte la settimana<br>(≤ 2 porzioni a settimana di carni bianche, < 2 porzioni di carni rosse, ≤ 1 porzione a settimana di carni lavorate es prosciutto cotto e bresaola) |
|  PESCE                       | 3-4 volte la settimana                                                                                                                                                          |
|  LEGUMI                      | 4-5 volte la settimana                                                                                                                                                          |
|  FORMAGGI                    | 2 volte la settimana                                                                                                                                                            |
|  UOVA                        | 1-2 volte la settimana                                                                                                                                                          |

## PIRAMIDE ALIMENTARE TRANSCULTURALE

Uno strumento di educazione alimentare per tutti i bambini sin dall'età prescolare

L'alimentazione nel bambino è di fondamentale importanza per il suo sviluppo ed ha anche un grande valore in termini di prevenzione. La nutrizione, infatti, è uno dei principali fattori ambientali in grado di modulare il potenziale genetico e la crescita di ogni individuo.

L'organismo umano consuma continuamente energia, gli alimenti forniscono le sostanze necessarie per garantire il fabbisogno energetico e le necessità dei diversi organi.

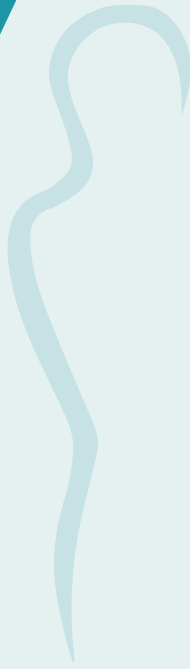

### COMITATO SCIENTIFICO:

Francesco Cataldo  
Giovanni Corsello  
Rosalia Maria Da Riolo  
Orazio Ranno  
Maria Rosaria Sisto  
Elvira Verduci
