# Supplementary material for: Educational Intervention of Healthy Life Promotion for Children with a Migrant Background or at Socioeconomic Disadvantage in the North of Italy: Efficacy of Telematic Tools in Improving Nutritional and Physical Activity Knowledge
Source: MDPI journal article supplement (doi:10.3390/nu13103634), 2021-10-17
Supplement: s1 [file s1]

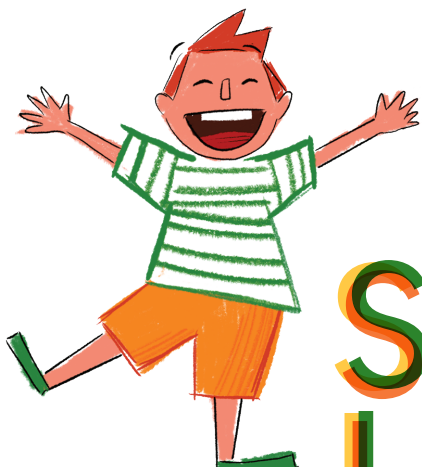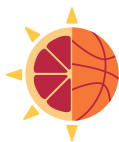

**Smuovi  
la salute**

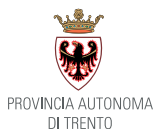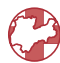

Azienda Provinciale  
per i Servizi Sanitari

# SMUOVI LA SALUTE

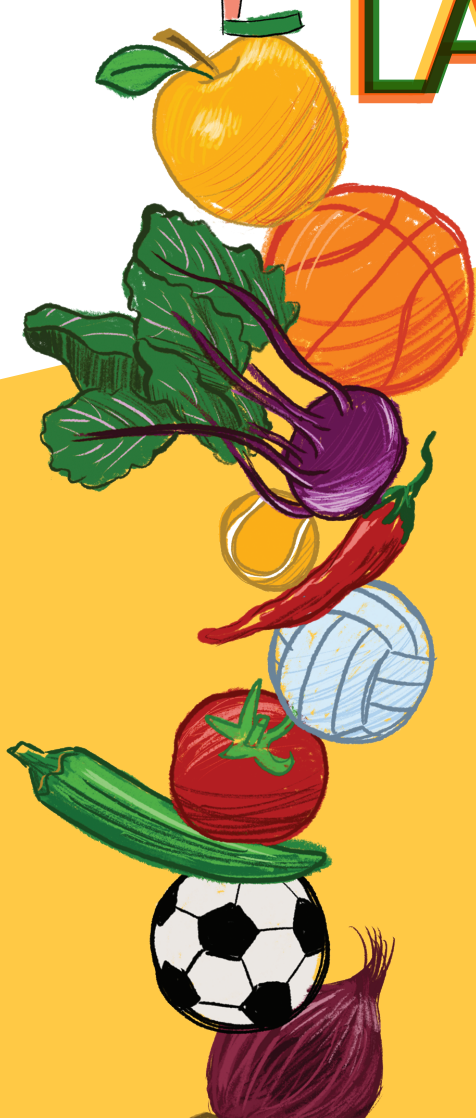

A Trento, Bolzano e Verona il progetto "Smuovi la salute" propone **attività per famiglie, bambini e ragazzi fino a 18 anni.** Oltre alle visite in ambulatorio (con pediatra, dietista e psicologo) le attività proposte aiutano ad avere uno stile di vita sano. Muoversi, camminare, giocare, mangiare frutta e verdura, preparare cibi sani, bere acqua al posto delle bevande zuccherate: sono piccole abitudini che fanno stare bene.

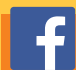

informazioni e aggiornamenti  
[@smuovilasalute](https://www.facebook.com/smuovilasalute)

## RICETTE SANE DAL MONDO

Da giugno è disponibile il libro **"Cucinare sano alla portata di tutti"** con tante ricette per portare in tavola i sapori delle culture culinarie di 25 paesi diversi. Sono ricette sane, di tutti i giorni, scritte insieme a chi ne conosce i segreti e la preparazione.

trovi il libro su [www.trentinosalute.net](http://www.trentinosalute.net)

### per informazioni

Sara Carneri, Pirus Fateh Moghadam  
Osservatorio per la salute, PAT  
Mail: [info@smuovilasalute.it](mailto:info@smuovilasalute.it)  
Cell: 3807107205

## GIOCHIAMO NEI PARCHI

Attività ludico-motoria per bambini dai 6 ai 10 anni e dagli 11 ai 13 anni.

**martedì, dalle 17.00 alle 18.30**  
**in un parco, in centro città**

**venerdì, dalle 9.30 alle 11.30**  
**al Parco di Melta, a Gardolo**

### per informazioni e iscrizioni

Beatrice Agostini  
UISP, Comitato del Trentino  
Mail: [b.agostini.trento@uisp.it](mailto:b.agostini.trento@uisp.it)  
Tel: 0461231128 - Cell: 3474022475

## QUIZ E SFIDE IN UNA APP

Scarica l'app e **segui Meddie e a Cleo nella loro avventura** per scoprire principi di alimentazione sana in modo semplice e divertente. Tieni aggiornato il tuo **diario alimentare** per ricevere suggerimenti, avanzare nelle sfide settimanali e conoscere nuove ricette deliziose.

trovi **SmuoviLaSalute** nel tuo app store

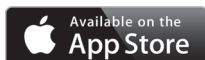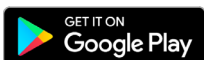

### per informazioni

Mail: [smuovilasalute@fbk.eu](mailto:smuovilasalute@fbk.eu)

## MANGIARE SANO: COSA, COME E PERCHÉ

Il cibo è **scoperta, conoscenza, cultura e relazione**. Incontri su sana alimentazione con Monica Ghezzi e Roberto Franceschi.

### per informazioni

Roberto Franceschi  
SC Pediatria Ospedale S. Chiara di Trento  
Mail: [roberto.franceschi@apss.tn.it](mailto:roberto.franceschi@apss.tn.it)

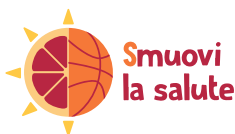

PROGETTO FINANZIATO DALL'INMP

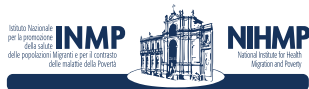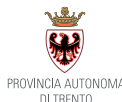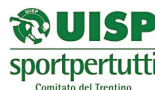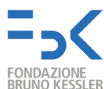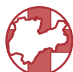

Azienda Provinciale  
per i Servizi Sanitari

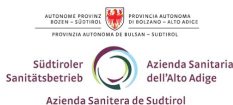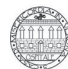

Azienda Ospedaliera  
Universitaria Integrata  
Verona

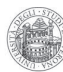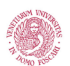

Università  
Ca' Foscari  
Venezia

**Osservatorio** per la salute  
PROVINCIA AUTONOMA DI TRENTO
